# Supplementary material for: Investigating gene signatures associated with immunity in colon adenocarcinoma to predict the immunotherapy effectiveness using NFM and WGCNA algorithms
Source: publisher site journal article supplement (doi:10.18632/aging.205763), 2024-05-13
Supplement: Supplementary file [file aging-v16i9-205763-supplementary-material-SD1.pdf]

## SUPPLEMENTARY FIGURES

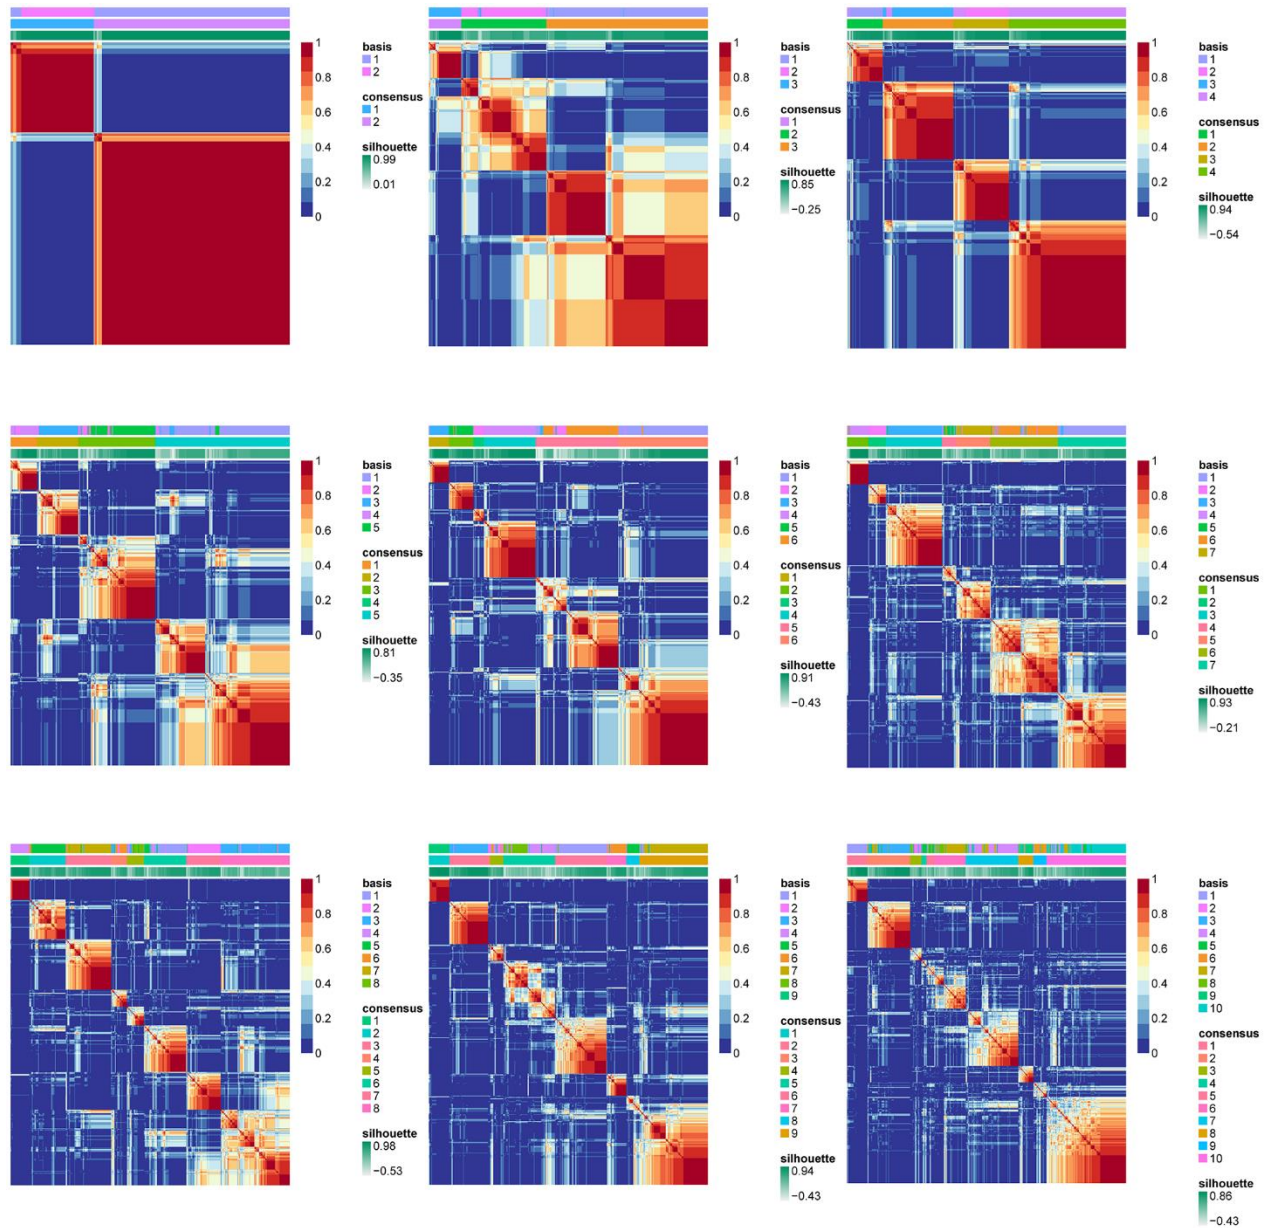

Supplementary Figure 1. Results of NFM analysis for classification numbers from 2 to 10.

**A**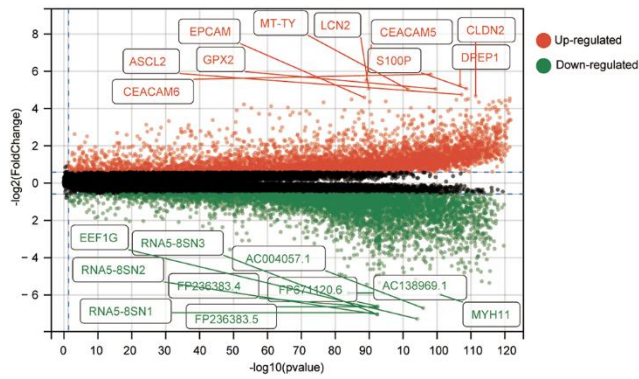**B**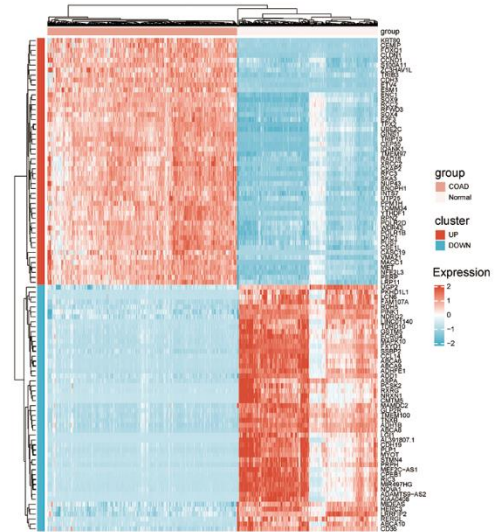

**Supplementary Figure 2. DEGs in COAD patients. (A)** Volcano plot; **(B)** Heat map (only the top 50 highly and lowly expressed genes are shown).

**A**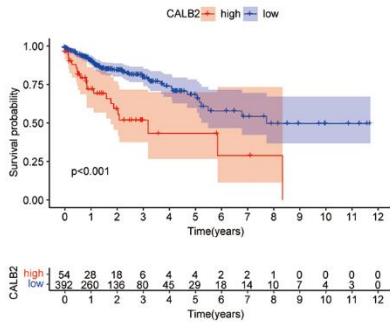**B**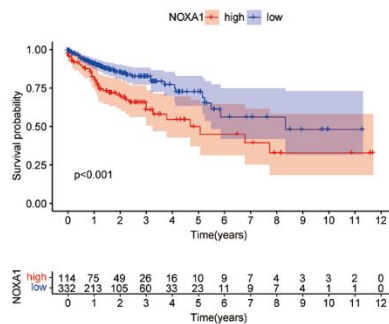**C**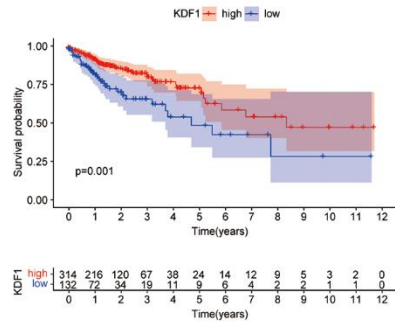**D**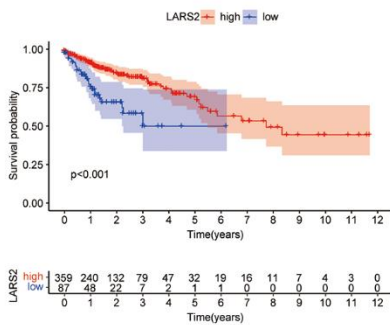**E**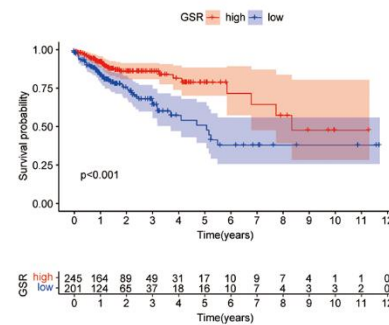**F**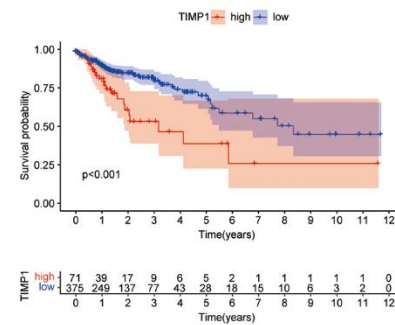

**Supplementary Figure 3. KM curves for genes used in the construction of DPM. (A–F)** KM survival curves for CALB2, NOXA1, KDF1, LARS2, GSR, and TIMP1.

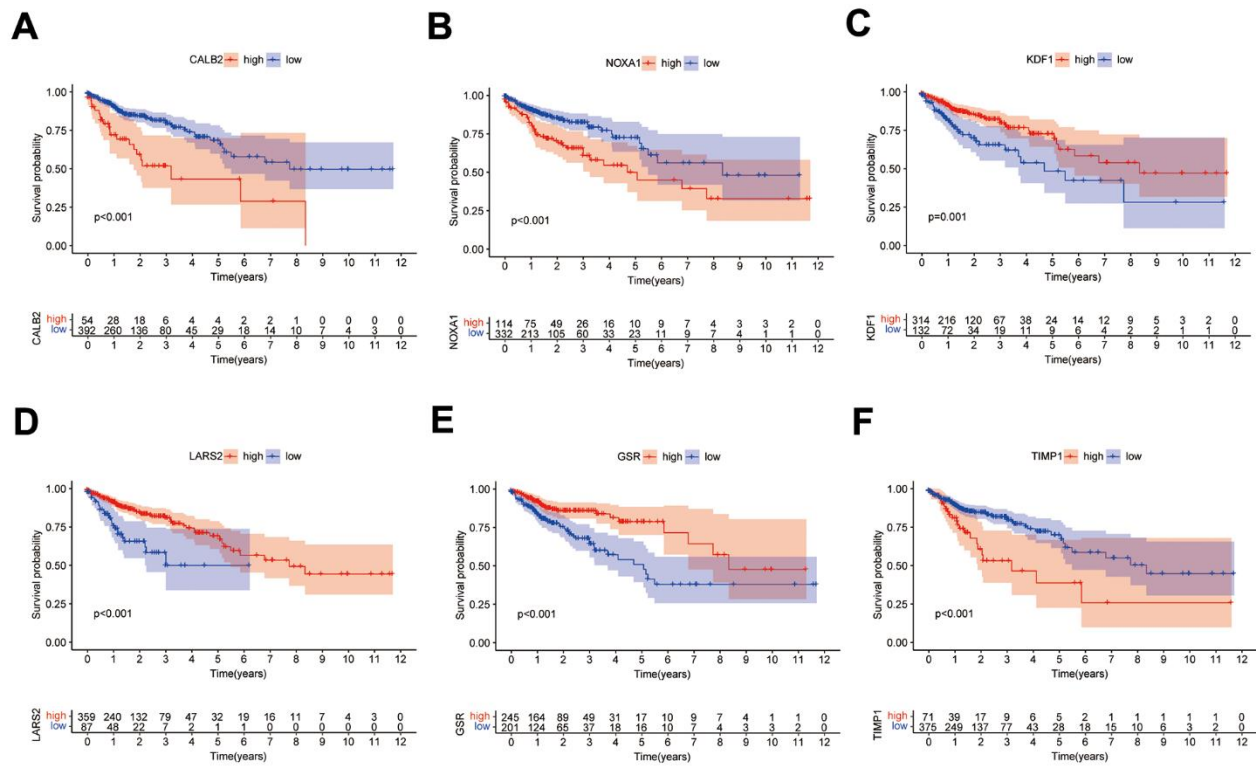

**Supplementary Figure 4. Relationship between clinical traits and prognosis of patients with COAD. (A–E)** KM survival curves for Age, T-stage, M-stage, N-stage, and stage.

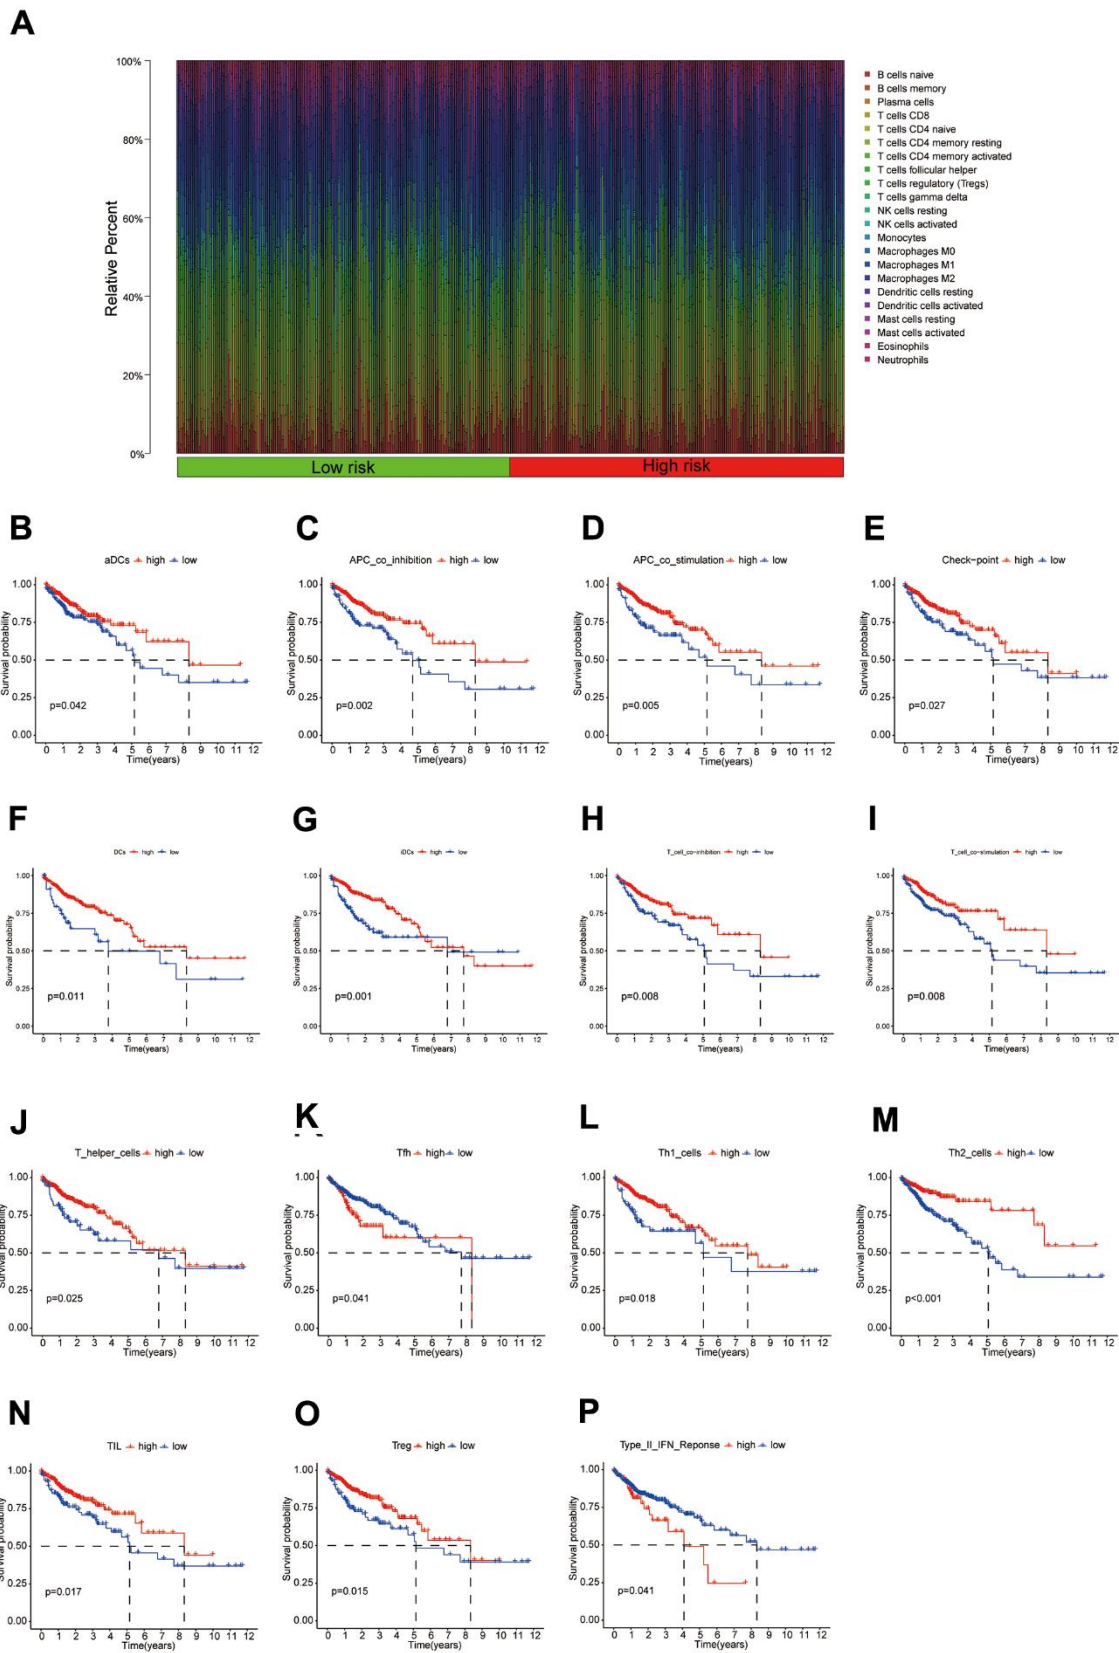

**Supplementary Figure 5. Relationship between immune cell function scores and the prognosis of patients with COAD.** (A) The proportion of immune cell distribution between subgroups; (B–P) KM survival curves for 15 immune cell function scores significantly associated with prognosis in COAD patients ( $p<0.05$ ).
