# Supplementary material for: Investigating gene signatures associated with immunity in colon adenocarcinoma to predict the immunotherapy effectiveness using NFM and WGCNA algorithms
Source: Aging (Albany NY). 2024 May 13;16(9):7596–621. doi: 10.18632/aging.205763 (PMC11131999; doi:10.18632/aging.205763)
Supplement: Supplementary Table 2 [file aging-16-205763-s003.xlsx]

## Sheet: Sheet1
Supplementary Table 2. Immune-related genes obtained from InnateDB.
gene
1700021K19RIK
4432412L15RIK
AAMP
ABCA1
ABCG1
ABL1
ACAP1
ACE
ACE2
ACHE
ACO1
ADAM10
ADAM17
ADAR
ADCY8
ADIPOQ
ADRB2
ADRBK1
AGER
AHR
AHSG
AI607873
AICDA
AIM2
AIMP1
AIP
AIRE
AKAP10
AKNA
AKT1
AMACR;C1QTNF3
AMFR
ANGPT1
ANKRD17
ANO6
ANPEP
ANXA1
ANXA2
ANXA4
AP3B1
APCS
APOA1
APOBEC3A
APOBEC3B
APOBEC3G
APOBEC3G;APOBEC3F
APOH
AQP3
AREG
ARF6
ARG1
ARHGAP15
ARL5B
ARRB2
ASCC3
ATF2
ATF3
ATF4
ATF7
ATG12
ATG16L1
ATG5
ATG7
ATG9A
ATM
AVP
AXL
AZI2
BAIAP2L1
BC094916
BCAR1
BCL10
BCL11B
BCL2
BCL2A1
BCL2L1
BCL3
BDKRB2
BECN1
BGN
BID
BIRC2
BIRC3
BIRC5
BMX
BNIP3
BNIP3L
BST2
BTK
BTN3A1
BTN3A2
BTN3A3
C19ORF29
C1QA
C1QB
C1QBP
C1QC
C1R
C1S
C2
C3
C3AR1
C4A
C4B
C4BP
C4BPA
C4BPB
C5
C5AR1
C6
C7
C8A
C8B
C8G
C9
CALCA
CALCOCO2
CALM1
CAMK2A
CAMKK2
CAMP
CAPRIN1
CARD16
CARD18
CARD6
CARD9
CASP1
CASP10
CASP12
CASP2
CASP4
CASP6
CASP7
CASP8
CAV1
CBL
CCBP2
CCDC88A
CCL1
CCL17
CCL2
CCL5
CCNA2
CCNT1
CCR3
CCR4
CCR6
CCR7
CD14
CD180
CD1D
CD200
CD200R1
CD209
CD209A
CD22
CD27
CD274
CD300A
CD300E
CD300LF
CD36
CD37
CD40
CD46
CD47
CD48
CD53
CD5L
CD63
CD81
CD86
CD8A
CD97
CDC42
CDK6
CDK9
CDKN1A
CDKN2A
CEACAM1
CEACAM8
CEBPA
CEBPB
CEBPD
CEBPE
CFB
CFH
CFLAR
CFP
CFTR
CHAT
CHGA
CHUK
CISH
CLEC1B
CLEC4C
CLEC4D
CLEC4E
CLEC4N
CLEC6A
CLEC7A
CLEC9A
CLTC
CMA1
CNOT4
CNOT8
CNPY3
COCH
COLEC12
COPS5
COPS8
CORO2A
COX5B
CR2
CREB1
CRKL
CRP
CRYAB
CSF1R
CSF2
CSF2RB
CSK
CTCF
CTLA4
CTNNAL1
CTNNB1
CTNND1
CTSB
CTSD
CTSG
CTSH
CTSK
CTSL1
CTSS
CXCL1
CXCL10
CXCL11
CXCL12
CXCL13
CXCL14
CXCL16
CXCL2
CXCL5
CXCL9
CXCR1
CXCR2
CXCR3
CXCR4
CXCR6
CYBA
CYBB
CYLD
CYTIP
DAB2IP
DAGLB
DAXX
DCD
DCN
DDIT3
DDX1
DDX21
DDX3X
DDX41
DDX58
DDX60L
DEFA1
DEFA20
DEFA3
DEFA4
DEFA5
DEFA6
DEFB1
DEFB103A
DEFB103B
DEFB14
DEFB3
DEFB4
DEFB4B
DHCR24
DHCR7
DHX15
DHX33
DHX36
DHX58
DHX9
DICER1
DLK1
DMBT1
DNASE2A
DNM1L
DOK3
DR1
DRD2
DUOX1
DUOX2
DUSP1
DUSP10
DUSP16
E2F1
EAR11
ECSIT
EDIL3
EDN1
EFTUD2
EGFR
EGLN2
EGR1
EHMT2
EIF2AK2
EIF4E
EIF4EBP1
EIF4EBP2
ELANE
ELAVL1
ELF1
ELF4
ELMOD2
ELP2
EPOR
EPS8
ERAP1
ERBB2IP
ERN1
ETS1
EZH2
F11
F2R
F2RL1
F2RL2
F2RL3
FADD
FANCC
FBXW5
FCGR1A
FCGR2A
FCN1
FCN2
FCN3
FCNA
FCNB
FCRL5
FER
FFAR2
FGF7
FLI1
FLT4
FOXA2
FOXO3
FPR1
FPR2
FREM1
FSCN1
FSTL1
FXR1
FZD1
G3BP1
GAB1
GABARAP
GAS6
GATA3
GATA4
GATA6
GBP1
GBP10
GBP2
GBP6
GBP7
GJA1
GLI1
GLRX
GM16379
GM4955
GNAI2
GNAI3
GNB2
GNB2L1
GOPC
GP2
GPR33
GPR77
GPSM1
GRK5
GRN
GSK3A
GSK3B
GSTP1
GZMM
H2-AA
H2-AB1
HACE1
HAMP
HAVCR2
HC
HDAC1
HDAC11
HDAC2
HERC5
HIF1A
HIF1AN
HLA-E
HMGB1
HMGB2
HMGB3
HMGN2
HMOX1
HNRNPL
HOXA9
HP
HRAS
HRG
HRH4
HS2ST1
HSA-LET-7E
HSA-MIR-126
HSA-MIR-132
HSA-MIR-146A
HSA-MIR-146B
HSA-MIR-148A
HSA-MIR-148B
HSA-MIR-152
HSA-MIR-98
HSF1
HSP90AA1
HSP90B1
HSPA14
HSPA1A
HSPA1B
HSPBP1
HSPD1
ICAM1
ICOSL
ID2
IDI1
IDO1
IFI16
IFI202B
IFI27
IFI6
IFIH1
IFIT1
IFIT2
IFIT3
IFIT5
IFITM1
IFITM2
IFITM3
IFNA1
IFNA2
IFNAR1
IFNAR2;IL10RB
IFNB1
IFNE
IFNG
IFNGR1
IFNGR2
IFRD1
IGF1
IGF1R
IGTP
IKBKB
IKBKE
IKBKG
IL10
IL12A
IL12B
IL13
IL13RA1
IL15
IL17A
IL17C
IL17F
IL17RD
IL17RE
IL18
IL18R1
IL19
IL1A
IL1B
IL1F7
IL1R1
IL1R2
IL1RAP
IL1RAPL1
IL1RL1
IL1RL2
IL2
IL20RA
IL20RB
IL21
IL22
IL22RA2
IL23A
IL25
IL27
IL28A
IL28B
IL28RA
IL29
IL2RB
IL2RG
IL31
IL32
IL33
IL4
IL4R
IL4RA
IL5
IL6
IL6ST
IL7
IL7R
IL8
IL8RB
IL9
ILF3
ILTIFB
IMPDH2
ING4
INPP5D
INSIG1
IP6K1
IRAK1
IRAK1BP1
IRAK2
IRAK3
IRAK4
IREB2
IRF1
IRF2
IRF2BP1
IRF3
IRF4
IRF5
IRF6
IRF7
IRF8
IRF9
IRGM1
ISG15
ISG20
ITCH
ITGA3
ITGAM
ITGAV
ITGAX
ITGB1
ITGB2
ITGB3
ITPR1
ITPR3
JAK1
JAK2
JAK3
JAM3
JMJD6
JUN
KAT2B
KCNJ8
KDM1
KDM4A
KDR
KEAP1
KHSRP
KIAA0226
KIR3DL2
KITL
KITLG
KLF4
KLK1
KPNA1
KRT16
LAIR1
LAT
LCN2
LCP2
LEP
LGALS1
LGALS2
LGALS3
LGALS4
LGALS8
LGALS9
LGMN
LGR4
LILRA2
LILRA4
LILRB3
LPCAT2
LRRFIP1
LRRFIP2
LRRK2
LST1
LTB4R
LTBR
LUM
LY6G
LY86
LY9
LY96
LYN
MAFB
MALT1
MAP1LC3C
MAP2K1
MAP2K2
MAP2K3
MAP2K4
MAP2K6
MAP2K7
MAP3K1
MAP3K12
MAP3K14
MAP3K3
MAP3K4
MAP3K5
MAP3K7
MAP3K7IP1
MAP3K7IP2
MAP3K7IP3
MAP3K8
MAPK1
MAPK14
MAPK3
MAPK8
MAPK9
MAPKAPK2
MARCH5
MARCO
MASP1
MASP2
MAVS
MB21D1
MBL1
MBL2
MCPT4
MEFV
MERTK
MFF
MFGE8
MFN1
MFN2
MID1
MID2
MIF
MIF;SLC2A11
MIR107
MIR10A
MIR10B
MIR122
MIR124-1
MIR125A
MIR125B1
MIR125B2
MIR126
MIR1275
MIR130A
MIR132
MIR133A1
MIR135B
MIR136
MIR141
MIR145
MIR146
MIR146A
MIR149
MIR15B
MIR16-1
MIR16-2
MIR181A2
MIR187
MIR199A-1
MIR200C
MIR203
MIR208B
MIR21
MIR212
MIR223
MIR23A
MIR23B
MIR29A
MIR302B
MIR3148
MIR328
MIR342
MIR362
MIR372
MIR373
MIR378
MIR466L
MIR467B
MIR485
MIR497
MIR499A
MIR517A
MIR517C
MIR548G
MIRLET7B
MIRLET7C
MKNK1
MLST8
MMP12
MMP7
MMP9
MMU-MIR-10A
MMU-MIR-29A
MMU-MIR-29B-1
MOLECULEID 216094
MOLECULEID 32847
MOV10
MRC1
MRGPRX2
MS4A8A
MS4A8B
MSR1
MST1R
MTA1
MTAP1S
MTOR
MUC1
MUL1
MX1
MX2
MYC
MYD88
MYH9
MYO18A
NAIP
NAIP2
NAIP5
NAMPT
NCKAP1L
NEU1
NFAT5
NFATC2
NFATC3
NFATC4
NFE2L2
NFIA
NFIL3
NFKB1
NFKB2
NFKBIA
NFKBIB
NFKBIE
NFKBIZ
NKIRAS1
NKIRAS2
NLRC3
NLRC4
NLRC5
NLRP1
NLRP10
NLRP11
NLRP12
NLRP13
NLRP14
NLRP1A
NLRP2
NLRP3
NLRP4
NLRP5
NLRP6
NLRP7
NLRP8
NLRP9
NLRX1
NOD1
NOD2
NOS2
NOTCH1
NOX1
NOX4
NOXA1
NR1H3
NR1H4
NR3C1
NR4A3
NRAS
NRIP1
NTN1
NUMB
NUMBL
NUP153
NUP214
NXN
OAS1
OAS1A
OAS1B
OAS1C
OAS1D
OAS1E
OAS1F
OAS1G
OAS1H
OAS2
OAS3
OLFM4
OPTN
ORAI1
OSM
OTUB1
OTUB2
OTUD5
OTUD7B
P2RX7
P2RY14
PACSIN1
PADI4
PARD3
PARK2
PCBP1
PCBP2
PDCD1
PDCD1LG2
PDE12
PELI1
PELI2
PELI3
PGLYRP1
PGLYRP2
PGLYRP3
PGLYRP4
PIAS1
PIAS2
PIAS3
PIAS4
PIK3AP1
PIK3C3
PIK3CA
PIK3CB
PIK3CD
PIK3CG
PIK3R1
PIN1
PKLR
PKN1
PLA2G2A
PLA2G4A
PLAUR
PLCG2
PLEC
PLG
PLK1
PLSCR1
PLTP
PLUNC
PLXNA4
PMAIP1
PML
POLR2F
PPARG
PPARGC1A
PPARGC1B
PPIA
PPP1CA
PPP1CC
PPP3CA
PPP3R1
PPP4C
PQBP1
PRDM1
PRKACA
PRKCA
PRKCD
PRKCE
PRKDC
PRKRA
PRKX
PRL
PRMT1
PROCR
PROS1
PRTN3
PSEN2
PSMA7
PSMB8
PSTPIP1
PTAFR
PTCH1
PTEN
PTGES
PTGES2
PTGS2
PTK2
PTK2B
PTMA
PTPN11
PTPN2
PTPN6
PTPRC
PTX3
PURA
PYCARD
PYDC3
PYHIN1
RAB11A
RAB8A
RAC1
RAC2
RAD21
RAD23A
RAET1A
RAET1C
RAG1
RANBP9
RARRES2
RASGEF1B
RB1
RBCK1
RCAN1
RCOR1
REG3G
REL
RELA
RELB
REST
RETNLA
RETNLB
RFTN1
RGMB
RGS2
RHBDF2
RHEB
RICTOR
RIPK1
RIPK2
RIPK3
RNASE7
RNASEL
RNF125
RNF135
RNF31
RNF41
RNF5
RORA
RORC
RP5-1000E10.4
RPL19
RPS19
RPS6KA4
RPS6KA5
RSAD2
RUNX3
RUSC1
RXRA
S100A10
S100A12
S100A8
S100A9
S1PR1
SAMHD1
SARM1
SC4MOL
SCAF11
SCAMP5
SCARB1
SCARF1
SCN5A
SDC4
SELE
SELK
SEMA3A
SENP2
SERPINB2
SERPINB9
SERPINE1
SERPING1
SF3A1
SFTPA1
SFTPA1B;SFTPA1
SFTPA2
SFTPD
SH2D1A
SHARPIN
SIAH1
SIAH2
SIGIRR
SIGLEC1
SIGLEC10
SIGLEC11
SIGLEC15
SIGLEC5
SIGLEC6
SIGLEC7
SIGLEC8
SIGLEC9
SIGLECE
SIGLECG
SIGLECH
SIRPA
SIRT1
SIVA1
SKP2
SLAMF1
SLAMF6
SLAMF7
SLAMF8
SLAMF9
SLC11A1
SLC15A4
SLC22A3
SLX4
SMAD3
SMAD4
SMAD6
SMAD7
SMARCA2
SMARCA4
SMARCE1
SMPDL3B
SNAP23
SNCA
SNX27
SOCS1
SOCS2
SOCS3
SOCS5
SOCS6
SOD1
SPAG11A
SPHK1
SPI1
SPINK5
SPON2
SPP1
SPPL3
SQSTM1
SRC
SREBF1
SREBF2
SRXN1
STAP2
STAT1
STAT2
STAT3
STAT4
STAT5A
STAT5B
STAT6
STIM1
STMN1
STUB1
SUGT1
SYK
SYKB
SYP
TACR1
TANK
TAX1BP1
TBK1
TBKBP1
TBX21
TCEB1
TCEB2
TCF4
TECPR1
TET2
TGFB1
TGTP1
THBS1
THRB
TICAM1
TICAM2
TIFA
TIRAP
TLR1
TLR10
TLR11
TLR13
TLR2
TLR3
TLR4
TLR5
TLR6
TLR7
TLR8
TLR9
TMED7
TMED7;TICAM2
TMEM126A
TMEM173
TNF
TNFAIP3
TNFAIP8L2
TNFRSF12A
TNFRSF13B
TNFRSF13C
TNFRSF18
TNFRSF1A
TNFRSF1B
TNFRSF9
TNFSF10
TNFSF11
TNFSF4
TNFSF9
TNIP1
TNIP3
TNK1
TOLLIP
TOMM70A
TP53
TP63
TP73
TPH1
TPP2
TPSB2
TPST1
TRADD
TRAF1
TRAF2
TRAF3
TRAF5
TRAF6
TRAFD1
TRAIP
TRAT1
TREM1
TREM2
TREML2
TREML4
TRIB2
TRIB3
TRIM12C
TRIM13
TRIM14
TRIM15
TRIM21
TRIM22
TRIM23
TRIM24
TRIM25
TRIM26
TRIM27
TRIM28
TRIM30
TRIM32
TRIM36
TRIM37
TRIM38
TRIM42
TRIM45
TRIM47
TRIM49
TRIM5
TRIM50
TRIM55
TRIM56
TRIM58
TRIM6
TRIM60
TRIM61
TRIM62
TRIM63
TRIM65
TRIM66
TRIM67
TRIM7
TRIM71
TRIM8
TRIM9
TRP53
TRP63
TRP73
TRPM2
TRPM5
TRPV2
TSC1
TSC22D3
TSLP
TUFM
TXNIP
TYK2
TYRO3
TYROBP
UBD
UBE2I
UBE2N
UBE2V2
UBE2W
UBQLN1
UCHL1
UCP2
ULK1
UNC5CL
UNC93B1
USP17
USP2
USP25
USP4
USP7
UVRAG
VASP
VDR
VEGFA
VEGFC
VENTX
VLDLR
VPS45
VTRNA2-1
WAS
WDFY1
WDR34
WDR62
WFDC12
WNT2B
WNT3A
WNT9B
XBP1
XDH
XIAP
XRCC5
XRCC6
YBX1
YJEFN3
YWHAE
YY1
ZBP1
ZBTB16
ZBTB20
ZC3H12A
ZC3HAV1
ZFP36
ZFP423
ZFPM1
ZFPM2
ZMYND11
